# Supplementary material for: Rapid Decrease in Fluoroquinolones Consumption following Implementation of a Simple Antimicrobial Stewardship Bundled Intervention in a University Hospital during the COVID-19 Pandemic
Source: MDPI journal article supplement (doi:10.3390/antibiotics12040694), 2023-04-02
Supplement: s1 [file s1]

Figure S1 a. Linear regression analysis of total antimicrobial consumption.

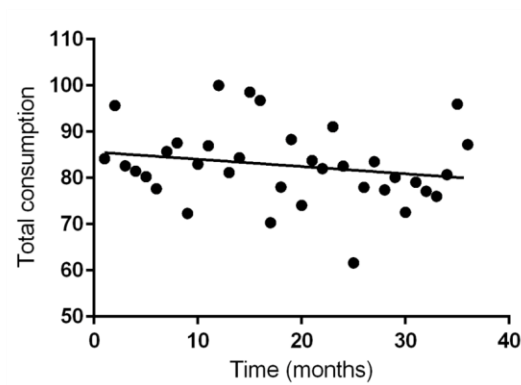

|                                         |                               |
|-----------------------------------------|-------------------------------|
| <b>Best-fit values</b>                  |                               |
| Slope                                   | -0.1573 ± 0.1311              |
| Y-intercept                             | 85.63 ± 2.782                 |
| X-intercept                             | 544.3                         |
| 1/Slope                                 | -6.356                        |
| <b>95% Confidence Intervals</b>         |                               |
| Slope                                   | -0.4240 to 0.1093             |
| Y-intercept                             | 79.98 to 91.29                |
| X-intercept                             | 213.4 to +infinity            |
| <b>Goodness of Fit</b>                  |                               |
| R square                                | 0.04063                       |
| Sy.x                                    | 8.172                         |
| <b>Is slope significantly non-zero?</b> |                               |
| F                                       | 1.440                         |
| DFn,DFd                                 | 1,34                          |
| P Value                                 | 0.2385                        |
| Deviation from horizontal?              | Not Significant               |
| <b>Data</b>                             |                               |
| Number of XY pairs                      | 36                            |
| Equation                                | $Y = -0.1573 \cdot X + 85.63$ |

Figure S1 b. Linear regression analysis of FQs consumption.

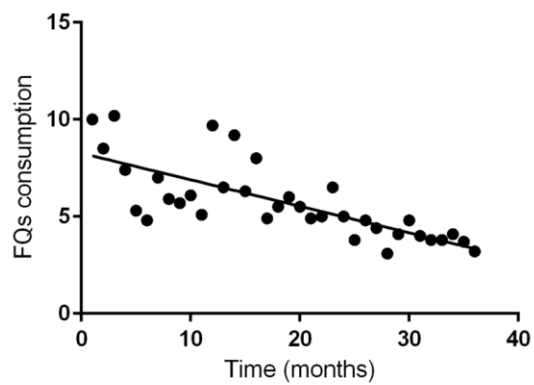

|                                         |                               |
|-----------------------------------------|-------------------------------|
| <b>Best-fit values</b>                  |                               |
| Slope                                   | -0.1366 ± 0.02076             |
| Y-intercept                             | 8.266 ± 0.4404                |
| X-intercept                             | 60.51                         |
| 1/Slope                                 | -7.321                        |
| <b>95% Confidence Intervals</b>         |                               |
| Slope                                   | -0.1788 to -0.09439           |
| Y-intercept                             | 7.370 to 9.162                |
| X-intercept                             | 50.20 to 79.69                |
| <b>Goodness of Fit</b>                  |                               |
| R square                                | 0.5602                        |
| Sy.x                                    | 1.294                         |
| <b>Is slope significantly non-zero?</b> |                               |
| F                                       | 43.31                         |
| DFn,DFd                                 | 1,34                          |
| P Value                                 | < 0.0001                      |
| Deviation from horizontal?              | Significant                   |
| <b>Data</b>                             |                               |
| Number of XY pairs                      | 36                            |
| Equation                                | $Y = -0.1366 \cdot X + 8.266$ |
